# Supplementary material for: Valorization of Traditional Alcoholic Beverages: The Study of the Sicilian Amarena Wine during Bottle Aging
Source: MDPI journal article supplement (doi:10.3390/foods11142152), 2022-07-20
Supplement: s1 [file s1]

## Supplementary Material

**Table S1.** Oenological properties of investigated Amarena wines in relation to bottle aging. For every parameter, data were expressed as mean  $\pm$  standard deviation of n=15 samples coming from 5 bottles, where every sample was analyzed three times. TPC: total phenol content; TAC= total anthocyanin content.

| Sample | Alcoholic grade<br>(% vol.)     | pH                           | Total dry extract<br>(g/L)        | Total sugars<br>(g/L)          | Total acidity<br>(g/L tartaric acid) | Volatile acidity<br>(g/L acetic acid) | Malic acid<br>(g/L)          | TPC<br>(mg GAE/L)                 | TAC<br>(mg ME/L)              |
|--------|---------------------------------|------------------------------|-----------------------------------|--------------------------------|--------------------------------------|---------------------------------------|------------------------------|-----------------------------------|-------------------------------|
| AMAR1  | 14.68 $\pm$ 0.30 <sup>a</sup>   | 3.56 $\pm$ 0.05 <sup>a</sup> | 190.93 $\pm$ 6.11 <sup>a</sup>    | 172.05 $\pm$ 8.25 <sup>a</sup> | 7.48 $\pm$ 0.30 <sup>a</sup>         | 0.79 $\pm$ 0.05 <sup>a</sup>          | 2.91 $\pm$ 0.46 <sup>a</sup> | 3221.93 $\pm$ 141.74 <sup>a</sup> | 58.50 $\pm$ 3.75 <sup>a</sup> |
| AMAR2  | 15.96 $\pm$ 0.91 <sup>b</sup>   | 3.73 $\pm$ 0.02 <sup>b</sup> | 170.47 $\pm$ 16.04 <sup>a,b</sup> | 142.68 $\pm$ 8.51 <sup>b</sup> | 7.93 $\pm$ 0.22 <sup>a,b</sup>       | 0.70 $\pm$ 0.02 <sup>b</sup>          | 3.73 $\pm$ 0.18 <sup>b</sup> | 3147.47 $\pm$ 157.05 <sup>a</sup> | 59.02 $\pm$ 3.05 <sup>a</sup> |
| AMAR3  | 16.02 $\pm$ 0.98 <sup>b</sup>   | 3.81 $\pm$ 0.04 <sup>c</sup> | 150.74 $\pm$ 9.48 <sup>b</sup>    | 136.58 $\pm$ 9.55 <sup>b</sup> | 7.62 $\pm$ 0.20 <sup>a,b</sup>       | 0.91 $\pm$ 0.04 <sup>c</sup>          | 3.74 $\pm$ 0.15 <sup>b</sup> | 3421.93 $\pm$ 185.09 <sup>a</sup> | 71.75 $\pm$ 2.57 <sup>b</sup> |
| AMAR4  | 14.06 $\pm$ 0.11 <sup>c</sup>   | 3.88 $\pm$ 0.05 <sup>c</sup> | 90.84 $\pm$ 6.66 <sup>c</sup>     | 72.05 $\pm$ 4.25 <sup>c</sup>  | 8.15 $\pm$ 0.26 <sup>b</sup>         | 0.82 $\pm$ 0.05 <sup>a</sup>          | 4.43 $\pm$ 0.29 <sup>c</sup> | 2927.33 $\pm$ 140.24 <sup>b</sup> | 27.66 $\pm$ 1.54 <sup>c</sup> |
| AMAR6  | 12.82 $\pm$ 0.18 <sup>d</sup>   | 3.57 $\pm$ 0.02 <sup>a</sup> | 129.93 $\pm$ 8.59 <sup>d</sup>    | 108.99 $\pm$ 8.77 <sup>d</sup> | 7.29 $\pm$ 0.17 <sup>a</sup>         | 0.46 $\pm$ 0.02 <sup>d,e</sup>        | 1.98 $\pm$ 0.17 <sup>d</sup> | 2623.87 $\pm$ 123.15 <sup>b</sup> | 15.77 $\pm$ 0.71 <sup>d</sup> |
| AMAR11 | 13.85 $\pm$ 0.36 <sup>e</sup>   | 3.97 $\pm$ 0.01 <sup>d</sup> | 111.77 $\pm$ 6.08 <sup>e</sup>    | 91.80 $\pm$ 6.35 <sup>c</sup>  | 5.99 $\pm$ 0.37 <sup>c</sup>         | 0.62 $\pm$ 0.03 <sup>f</sup>          | 1.12 $\pm$ 0.14 <sup>e</sup> | 2792.00 $\pm$ 144.05 <sup>b</sup> | 17.71 $\pm$ 2.91 <sup>d</sup> |
| AMAR20 | 13.74 $\pm$ 0.26 <sup>c,e</sup> | 4.30 $\pm$ 0.03 <sup>e</sup> | 63.84 $\pm$ 1.58 <sup>f</sup>     | 55.10 $\pm$ 2.79 <sup>e</sup>  | 6.06 $\pm$ 0.45 <sup>c</sup>         | 0.52 $\pm$ 0.04 <sup>d</sup>          | 1.06 $\pm$ 0.03 <sup>e</sup> | 1995.73 $\pm$ 259.84 <sup>c</sup> | 4.23 $\pm$ 0.49 <sup>e</sup>  |
| AMAR25 | 13.11 $\pm$ 0.45 <sup>d</sup>   | 4.26 $\pm$ 0.07 <sup>f</sup> | 47.06 $\pm$ 3.66 <sup>g</sup>     | 30.06 $\pm$ 2.28 <sup>f</sup>  | 5.40 $\pm$ 0.21 <sup>c</sup>         | 0.43 $\pm$ 0.02 <sup>d,e</sup>        | 0.34 $\pm$ 0.06 <sup>f</sup> | 1501.13 $\pm$ 167.76 <sup>d</sup> | 3.62 $\pm$ 0.55 <sup>e</sup>  |

a–g: different superscript letters in the same column indicate significantly different values for a given parameter (p < 0.05 by post hoc Tukey's HSD test); same superscript letters in the same column indicate not significantly different values for

a given parameter (p > 0.05 by post hoc Tukey's HSD test).

**Table S2.** Chromaticity of samples from Amarena wines in relation to bottle aging. For every parameter, data were expressed as mean  $\pm$  standard deviation of n=15 samples coming from 5 bottles, where every sample was analyzed three times.

| Sample | Luminosity<br>(Y)             | Hue<br>(x)                     | Purity<br>(y)                  |
|--------|-------------------------------|--------------------------------|--------------------------------|
| AMAR1  | 3.53 $\pm$ 0.30 <sup>a</sup>  | 0.56 $\pm$ 0.02 <sup>a</sup>   | 0.19 $\pm$ 0.03 <sup>a</sup>   |
| AMAR2  | 3.21 $\pm$ 0.24 <sup>a</sup>  | 0.54 $\pm$ 0.05 <sup>a</sup>   | 0.18 $\pm$ 0.02 <sup>a</sup>   |
| AMAR3  | 3.38 $\pm$ 0.58 <sup>a</sup>  | 0.58 $\pm$ 0.04 <sup>a</sup>   | 0.23 $\pm$ 0.03 <sup>a,b</sup> |
| AMAR4  | 3.45 $\pm$ 0.31 <sup>a</sup>  | 0.70 $\pm$ 0.05 <sup>b</sup>   | 0.28 $\pm$ 0.03 <sup>b</sup>   |
| AMAR6  | 5.18 $\pm$ 0.33 <sup>b</sup>  | 0.67 $\pm$ 0.04 <sup>b,a</sup> | 0.29 $\pm$ 0.04 <sup>b,c</sup> |
| AMAR11 | 14.44 $\pm$ 0.65 <sup>c</sup> | 0.58 $\pm$ 0.04 <sup>b,a</sup> | 0.34 $\pm$ 0.02 <sup>c</sup>   |
| AMAR20 | 13.33 $\pm$ 0.67 <sup>c</sup> | 0.62 $\pm$ 0.04 <sup>b,a</sup> | 0.36 $\pm$ 0.03 <sup>c</sup>   |
| AMAR25 | 17.60 $\pm$ 0.26 <sup>d</sup> | 0.61 $\pm$ 0.03 <sup>b,a</sup> | 0.39 $\pm$ 0.03 <sup>c</sup>   |

a-g: different superscript letters in the same column indicate significantly different values for a given parameter ( $p < 0.05$  by post hoc Tukey's HSD test); same superscript letters in the same column indicate not significantly different values for a given parameter ( $p > 0.05$  by post hoc Tukey's HSD test).

**Table S3.** Element profile of Amarena wines in relation to bottle aging. Data were expressed as mean  $\pm$  standard deviation of n=15 samples coming from 5 bottles, where every sample was analyzed three times.

| Sample | Na<br>(mg/L)                 | Mg<br>(mg/L)                    | K<br>(mg/L)                       | Mn<br>(mg/L)                   | Fe<br>(mg/L)                  | Cu<br>(mg/L)                   | Zn<br>(mg/L)                 | Cd<br>( $\mu$ g/L)           | Pb<br>( $\mu$ g/L)             |
|--------|------------------------------|---------------------------------|-----------------------------------|--------------------------------|-------------------------------|--------------------------------|------------------------------|------------------------------|--------------------------------|
| AMAR1  | 0.63 $\pm$ 0.12 <sup>a</sup> | 59.59 $\pm$ 4.88 <sup>a</sup>   | 1784.03 $\pm$ 237.42 <sup>a</sup> | 0.85 $\pm$ 0.03 <sup>a</sup>   | 2.75 $\pm$ 0.35 <sup>a</sup>  | 0.052 $\pm$ 0.012 <sup>a</sup> | 0.69 $\pm$ 0.11 <sup>a</sup> | 8.43 $\pm$ 2.53 <sup>a</sup> | 60.07 $\pm$ 8.76 <sup>a</sup>  |
| AMAR2  | 0.92 $\pm$ 0.06 <sup>b</sup> | 66.12 $\pm$ 1.97 <sup>a</sup>   | 2045.67 $\pm$ 109.27 <sup>a</sup> | 0.57 $\pm$ 0.02 <sup>b</sup>   | 2.53 $\pm$ 0.18 <sup>a</sup>  | 0.049 $\pm$ 0.018 <sup>a</sup> | 0.72 $\pm$ 0.09 <sup>a</sup> | 9.30 $\pm$ 3.77 <sup>a</sup> | 85.60 $\pm$ 10.75 <sup>b</sup> |
| AMAR3  | 1.87 $\pm$ 0.13 <sup>c</sup> | 75.81 $\pm$ 1.95 <sup>b</sup>   | 1959.00 $\pm$ 162.00 <sup>a</sup> | 0.83 $\pm$ 0.06 <sup>a</sup>   | 2.90 $\pm$ 0.35 <sup>a</sup>  | 0.12 $\pm$ 0.012 <sup>b</sup>  | 0.52 $\pm$ 0.12 <sup>a</sup> | 8.88 $\pm$ 1.48 <sup>a</sup> | 57.65 $\pm$ 9.86 <sup>a</sup>  |
| AMAR4  | 1.48 $\pm$ 0.07 <sup>d</sup> | 84.03 $\pm$ 1.84 <sup>c</sup>   | 2067.88 $\pm$ 112.59 <sup>a</sup> | 0.30 $\pm$ 0.04 <sup>c</sup>   | 1.68 $\pm$ 0.21 <sup>b</sup>  | 0.015 $\pm$ 0.007 <sup>d</sup> | 0.11 $\pm$ 0.03 <sup>b</sup> | 1.27 $\pm$ 0.42 <sup>b</sup> | 1.25 $\pm$ 0.33 <sup>c</sup>   |
| AMAR6  | 1.57 $\pm$ 0.09 <sup>d</sup> | 87.75 $\pm$ 2.96 <sup>c</sup>   | 2724.22 $\pm$ 120.63 <sup>b</sup> | 1.27 $\pm$ 0.15 <sup>d</sup>   | 3.85 $\pm$ 0.09 <sup>c</sup>  | 0.79 $\pm$ 0.10 <sup>c</sup>   | 1.52 $\pm$ 0.16 <sup>c</sup> | 1.20 $\pm$ 0.41 <sup>b</sup> | 1.65 $\pm$ 0.56 <sup>c</sup>   |
| AMAR11 | 2.45 $\pm$ 0.14 <sup>e</sup> | 96.71 $\pm$ 2.35 <sup>d</sup>   | 2958.17 $\pm$ 171.13 <sup>b</sup> | 2.12 $\pm$ 0.21 <sup>e</sup>   | 4.08 $\pm$ 0.48 <sup>c</sup>  | 0.41 $\pm$ 0.07 <sup>f</sup>   | 1.99 $\pm$ 0.12 <sup>d</sup> | 1.33 $\pm$ 0.32 <sup>b</sup> | 22.27 $\pm$ 6.17 <sup>d</sup>  |
| AMAR20 | 2.54 $\pm$ 0.11 <sup>e</sup> | 169.56 $\pm$ 10.44 <sup>c</sup> | 4075.77 $\pm$ 151.18 <sup>c</sup> | 2.34 $\pm$ 0.32 <sup>e</sup>   | 6.66 $\pm$ 0.85 <sup>d</sup>  | 0.77 $\pm$ 0.11 <sup>e</sup>   | 2.03 $\pm$ 0.14 <sup>d</sup> | 1.13 $\pm$ 0.51 <sup>b</sup> | 20.60 $\pm$ 4.99 <sup>d</sup>  |
| AMAR25 | 2.94 $\pm$ 0.15 <sup>f</sup> | 113.78 $\pm$ 8.17 <sup>f</sup>  | 5225.35 $\pm$ 190.06 <sup>d</sup> | 11.66 $\pm$ 1.376 <sup>f</sup> | 10.95 $\pm$ 1.40 <sup>e</sup> | 1.64 $\pm$ 0.40 <sup>g</sup>   | 7.00 $\pm$ 0.17 <sup>e</sup> | 1.17 $\pm$ 0.51 <sup>b</sup> | 34.3 $\pm$ 5.80 <sup>d</sup>   |

a–g: different superscript letters in the same column indicate significantly different values for a given parameter ( $p < 0.05$  by post hoc Tukey's HSD test); same superscript letters in the same column indicate not significantly different values for a given parameter ( $p > 0.05$  by post hoc Tukey's HSD test).

**Table S4.** Volatile compounds (mg/L) of Amarena wines during bottle aging. Data were expressed as mean  $\pm$  standard deviation of n=15 samples coming from 5 bottles, where every sample was analyzed three times.

| Analyte                        | AMAR1                           | AMAR2                             | AMAR3                          | AMAR4                          | AMAR6                             | AMAR11                            | AMAR20                           | AMAR25                          |
|--------------------------------|---------------------------------|-----------------------------------|--------------------------------|--------------------------------|-----------------------------------|-----------------------------------|----------------------------------|---------------------------------|
| <b>Acetaldehyde</b>            | 26.19 $\pm$ 1.31 <sup>a</sup>   | 22.49 $\pm$ 0.96 <sup>b</sup>     | 36.74 $\pm$ 1.72 <sup>c</sup>  | 41.91 $\pm$ 1.83 <sup>d</sup>  | 50.01 $\pm$ 1.75 <sup>e</sup>     | 68.89 $\pm$ 1.18 <sup>f</sup>     | 79.37 $\pm$ 1.08 <sup>g</sup>    | 87.17 $\pm$ 1.49 <sup>h</sup>   |
| <b>Ethyl acetate</b>           | 40.56 $\pm$ 0.96 <sup>a</sup>   | 41.83 $\pm$ 0.84 <sup>a</sup>     | 38.27 $\pm$ 1.17 <sup>b</sup>  | 55.01 $\pm$ 1.02 <sup>c</sup>  | 93.60 $\pm$ 1.27 <sup>d</sup>     | 86.25 $\pm$ 1.06 <sup>e</sup>     | 96.56 $\pm$ 0.84 <sup>f</sup>    | 102.87 $\pm$ 1.87 <sup>g</sup>  |
| <b>Methanol</b>                | 50.69 $\pm$ 1.16 <sup>a</sup>   | 53.49 $\pm$ 1.45 <sup>b</sup>     | 53.94 $\pm$ 1.43 <sup>b</sup>  | 60.66 $\pm$ 1.88 <sup>c</sup>  | 53.55 $\pm$ 1.13 <sup>b</sup>     | 56.02 $\pm$ 1.77 <sup>c</sup>     | 59.59 $\pm$ 1.52 <sup>c</sup>    | 60.51 $\pm$ 1.56 <sup>c</sup>   |
| <i>Higher alcohols</i>         |                                 |                                   |                                |                                |                                   |                                   |                                  |                                 |
| <b>Propan-1-ol</b>             | 31.73 $\pm$ 1.33 <sup>a</sup>   | 51.66 $\pm$ 1.28 <sup>b</sup>     | 39.81 $\pm$ 2.02 <sup>c</sup>  | 40.21 $\pm$ 1.94 <sup>c</sup>  | 40.49 $\pm$ 1.87 <sup>c</sup>     | 39.35 $\pm$ 2.13 <sup>c</sup>     | 36.84 $\pm$ 2.23 <sup>c</sup>    | 37.52 $\pm$ 1.61 <sup>c</sup>   |
| <b>Isobutanol</b>              | 62.89 $\pm$ 1.81 <sup>a</sup>   | 60.69 $\pm$ 1.52 <sup>a</sup>     | 50.52 $\pm$ 1.20 <sup>b</sup>  | 61.27 $\pm$ 1.51 <sup>a</sup>  | 72.51 $\pm$ 1.66 <sup>c</sup>     | 69.19 $\pm$ 1.81 <sup>c</sup>     | 80.52 $\pm$ 1.97 <sup>d</sup>    | 81.82 $\pm$ 2.15 <sup>d</sup>   |
| <b>Butan-1-ol</b>              | 0.72 $\pm$ 0.13 <sup>a</sup>    | 0.68 $\pm$ 0.12 <sup>a</sup>      | 0.69 $\pm$ 0.13 <sup>a</sup>   | 0.86 $\pm$ 0.06 <sup>a</sup>   | 1.04 $\pm$ 0.16 <sup>b</sup>      | 2.16 $\pm$ 0.23 <sup>c</sup>      | 2.00 $\pm$ 0.11 <sup>c</sup>     | 2.07 $\pm$ 0.12 <sup>c</sup>    |
| <b>2-methyl-1-butanol</b>      | 29.63 $\pm$ 1.76 <sup>a</sup>   | 29.30 $\pm$ 1.65 <sup>a</sup>     | 23.48 $\pm$ 1.66 <sup>b</sup>  | 27.52 $\pm$ 1.60 <sup>a</sup>  | 38.99 $\pm$ 1.16 <sup>c</sup>     | 40.29 $\pm$ 1.39 <sup>c</sup>     | 50.23 $\pm$ 1.73 <sup>d</sup>    | 49.99 $\pm$ 1.20 <sup>d</sup>   |
| <b>3-methyl-1-butanol</b>      | 179.67 $\pm$ 4.24 <sup>a</sup>  | 177.24 $\pm$ 4.16 <sup>a</sup>    | 182.00 $\pm$ 4.46 <sup>a</sup> | 176.71 $\pm$ 3.38 <sup>a</sup> | 180.50 $\pm$ 4.72 <sup>a</sup>    | 190.43 $\pm$ 3.52 <sup>b</sup>    | 199.12 $\pm$ 5.34 <sup>b,c</sup> | 203.35 $\pm$ 4.44 <sup>c</sup>  |
| <b>Total</b>                   | 304.64 $\pm$ 18.31 <sup>a</sup> | 319.57 $\pm$ 17.98 <sup>a,b</sup> | 296.50 $\pm$ 9.31 <sup>a</sup> | 306.57 $\pm$ 9.71 <sup>a</sup> | 333.53 $\pm$ 11.21 <sup>b,c</sup> | 341.42 $\pm$ 29.23 <sup>b,c</sup> | 368.71 $\pm$ 28.21 <sup>c</sup>  | 374.75 $\pm$ 19.29 <sup>c</sup> |
| <i>Furanic compounds</i>       |                                 |                                   |                                |                                |                                   |                                   |                                  |                                 |
| <b>2-furfural</b>              | 0.89 $\pm$ 0.39 <sup>a</sup>    | 0.84 $\pm$ 0.35 <sup>a</sup>      | 1.33 $\pm$ 0.32 <sup>a</sup>   | 6.54 $\pm$ 1.25 <sup>b</sup>   | 2.23 $\pm$ 0.80 <sup>c</sup>      | 9.60 $\pm$ 0.99 <sup>d</sup>      | 22.94 $\pm$ 2.06 <sup>e</sup>    | 30.35 $\pm$ 2.17 <sup>f</sup>   |
| <b>5-hydroxymethylfurfural</b> | 6.06 $\pm$ 1.08 <sup>a</sup>    | 6.55 $\pm$ 1.28 <sup>a</sup>      | 6.11 $\pm$ 1.40 <sup>a</sup>   | 28.70 $\pm$ 1.60 <sup>b</sup>  | 7.83 $\pm$ 0.90 <sup>a</sup>      | 29.67 $\pm$ 1.33 <sup>b</sup>     | 75.72 $\pm$ 1.60 <sup>c</sup>    | 95.54 $\pm$ 3.10 <sup>d</sup>   |
| <b>5-methylfurfural</b>        | 0.062 $\pm$ 0.015 <sup>a</sup>  | 0.026 $\pm$ 0.012 <sup>b</sup>    | 0.045 $\pm$ 0.017 <sup>b</sup> | 0.12 $\pm$ 0.03 <sup>c</sup>   | 0.19 $\pm$ 0.07 <sup>c</sup>      | 0.31 $\pm$ 0.03 <sup>c,d</sup>    | 0.33 $\pm$ 0.04 <sup>d</sup>     | 0.27 $\pm$ 0.01 <sup>c,d</sup>  |
| <b>Furfuril alcol</b>          | 0.071 $\pm$ 0.02 <sup>a</sup>   | 0.21 $\pm$ 0.04 <sup>b</sup>      | 0.16 $\pm$ 0.03 <sup>b</sup>   | 0.17 $\pm$ 0.02 <sup>b</sup>   | 0.21 $\pm$ 0.04 <sup>b,c</sup>    | 0.26 $\pm$ 0.04 <sup>c</sup>      | 0.28 $\pm$ 0.04 <sup>c</sup>     | 0.28 $\pm$ 0.03 <sup>c</sup>    |
| <i>Ethyl esters</i>            |                                 |                                   |                                |                                |                                   |                                   |                                  |                                 |
| <b>Ethyl propanoate</b>        | 0.13 $\pm$ 0.02 <sup>a</sup>    | 0.22 $\pm$ 0.03 <sup>b</sup>      | 0.17 $\pm$ 0.02 <sup>a</sup>   | 0.21 $\pm$ 0.01 <sup>b</sup>   | 0.17 $\pm$ 0.01 <sup>a</sup>      | ND                                | ND                               | ND                              |
| <b>Ethyl butanoate</b>         | 0.062 $\pm$ 0.016 <sup>a</sup>  | 0.097 $\pm$ 0.017 <sup>a</sup>    | 0.10 $\pm$ 0.02 <sup>a</sup>   | 0.10 $\pm$ 0.01 <sup>a</sup>   | 0.080 $\pm$ 0.006 <sup>a</sup>    | ND                                | ND                               | ND                              |
| <b>Ethyl caproate</b>          | 0.10 $\pm$ 0.03 <sup>a</sup>    | 0.13 $\pm$ 0.02 <sup>a,b</sup>    | 0.17 $\pm$ 0.02 <sup>b</sup>   | 0.15 $\pm$ 0.01 <sup>a,b</sup> | 0.19 $\pm$ 0.01 <sup>b</sup>      | ND                                | ND                               | ND                              |
| <b>Ethyl laureate</b>          | 0.090 $\pm$ 0.020 <sup>a</sup>  | 0.11 $\pm$ 0.01 <sup>a</sup>      | 0.19 $\pm$ 0.01 <sup>b</sup>   | 0.18 $\pm$ 0.01 <sup>b</sup>   | 0.19 $\pm$ 0.01 <sup>b</sup>      | ND                                | ND                               | ND                              |
| <b>Ethyl myristate</b>         | 0.22 $\pm$ 0.03 <sup>a</sup>    | 0.24 $\pm$ 0.03 <sup>a</sup>      | 0.22 $\pm$ 0.01 <sup>a</sup>   | 0.27 $\pm$ 0.02 <sup>b</sup>   | 0.19 $\pm$ 0.01 <sup>a</sup>      | ND                                | ND                               | ND                              |
| <b>Ethyl palmitate</b>         | 0.061 $\pm$ 0.008 <sup>a</sup>  | 0.043 $\pm$ 0.011 <sup>a,b</sup>  | 0.079 $\pm$ 0.009 <sup>a</sup> | 0.11 $\pm$ 0.01 <sup>c</sup>   | 0.10 $\pm$ 0.01 <sup>c</sup>      | ND                                | ND                               | ND                              |
| <b>Ethyl levulinate</b>        | 0.031 $\pm$ 0.006 <sup>a</sup>  | 0.029 $\pm$ 0.005 <sup>a</sup>    | 0.033 $\pm$ 0.003 <sup>a</sup> | 0.048 $\pm$ 0.004 <sup>b</sup> | 0.045 $\pm$ 0.007 <sup>b</sup>    | ND                                | ND                               | ND                              |
| <b>Diethyl glutarate</b>       | 0.040 $\pm$ 0.007 <sup>a</sup>  | 0.033 $\pm$ 0.006 <sup>a,b</sup>  | 0.025 $\pm$ 0.004 <sup>b</sup> | 0.061 $\pm$ 0.009 <sup>c</sup> | 0.033 $\pm$ 0.006 <sup>b</sup>    | ND                                | ND                               | ND                              |

a–h: different superscript letters in the same row indicate significantly different values for a given parameter ( $p < 0.05$  by post hoc Tukey's HSD test); same superscript letters in the same column indicate not significantly different values for a given parameter ( $p > 0.05$  by post hoc Tukey's HSD test).
